# Supplementary material
Source: Springer Nature journal article supplement (https://www.springermedizin.de/resource/supplementary/12889_2012_3912_MOESM1_ESM.pdf/9491012)
Supplement: MOESM1 [file 9491012]

Review of previous intervention studies (August 2010)  
Project Officer (PO) intervention development work with universities (n=6)  
(Oct 2010 to Dec 2010)

4 Universities recruited to implement  
the intervention  
(Dec 2010)

2 universities unable to implement  
intervention in study period

Academic supervisor support for PO (from Feb 2011)  
Survey of 1<sup>st</sup> year undergraduates (n=8,331) across universities (April to May 2011)  
Social norm messages identified from responders (n= 998)  
Development of social norm materials and toolkit by PO and Intervention Steering Group  
(June to August 2011)

Randomisation of university halls (n= 50) across university campuses  
(August 2011)

Intervention halls (n= 25)

Control halls (n= 25)

University wide Alcohol Toolkit implementation (from Sept 2011)

Social norm intervention implementation  
(Oct – Dec 2011)  
(Jan to March 2012)

On line and post survey of 1<sup>st</sup> year students in universities (Feb – March 2012)

**Primary outcome**

Units of alcohol per week DDQ

**Secondary outcomes -**

Alcohol consumption DDQ / AUDIT

Rutgers Alcohol Problem Index

Drinking Norms Rating Form (Baer et al, 1986)

Injunctive norms (Neighbours et al, 2008)

Process  
evaluation  
(Oct 2011 to  
June 2012)

Focus Groups  
(Years 1 to 3).

Observation  
of materials  
and context.

Stakeholder  
Interviews.

Survey of  
exposure and  
reception.
